# Supplementary material for: RETRACTED ARTICLE: PIWIL2 restrains the progression of thyroid cancer via interaction with miR-146a-3p
Source: Springer Nature journal article supplement (doi:10.1186/s12902-023-01416-0), 2023-08-29
Supplement: MOESM1 [file 12902_2023_1416_MOESM1_ESM.pdf]

## **Supplementary Figure Legends**

**Supplementary Figure 1.** The original Western Blot film of all 20 paired TC tissue. TC: thyroid cancer.

**Supplementary Figure 2.** The expression of PIWIL2 after PIWIL2 was over-expressed or knocked down. \*\*:  $P < 0.01$  between groups. N=6. TC: thyroid cancer.
